# Supplementary material
Source: publisher figshare collection journal article supplement (https://acs.figshare.com/ndownloader/files/4267378)
Supplement: Supplementary file 1 [file 4267378]

# Complete Synthesis of Germanium Nanocrystal Encrusted Carbon Colloids in Supercritical CO<sub>2</sub> and their Superhydrophobic Properties

Christopher A. Barrett, Ajay Singh, Joseph A. Murphy, Catriona O'Sullivan, D. N. Buckley and Kevin M. Ryan\*

*Department of Chemical and Environmental Sciences, Department of Physics and Materials and Surface Science Institute, University of Limerick, Limerick, Ireland  
Department of Chemistry, University of Georgia, Athens, 30602, USA*

\*To whom correspondence should be addressed. Email: [kevin.m.ryan@ul.ie](mailto:kevin.m.ryan@ul.ie)

## Supporting Information

### Experimental Setup of Apparatus:

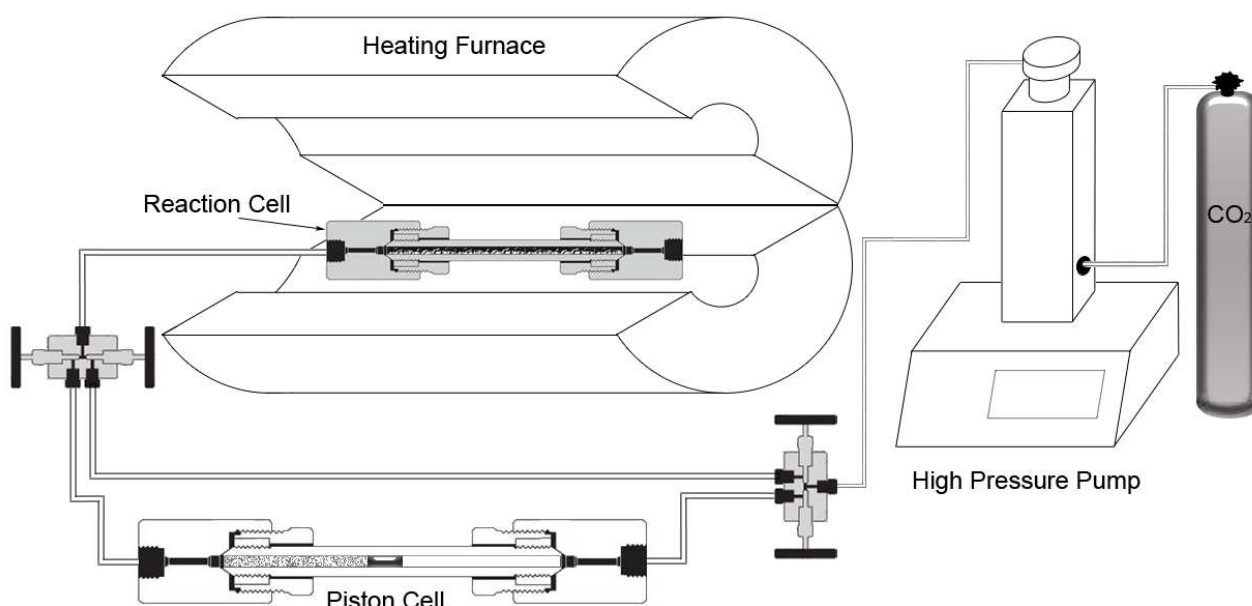

**Figure S1.** A schematic outlining the set-up used for supercritical fluid synthesis of materials is shown. A high pressure pump is directly connected to either stainless steel or titanium reaction vessels, which are then placed within a three zone furnace.

## SEM Analysis:

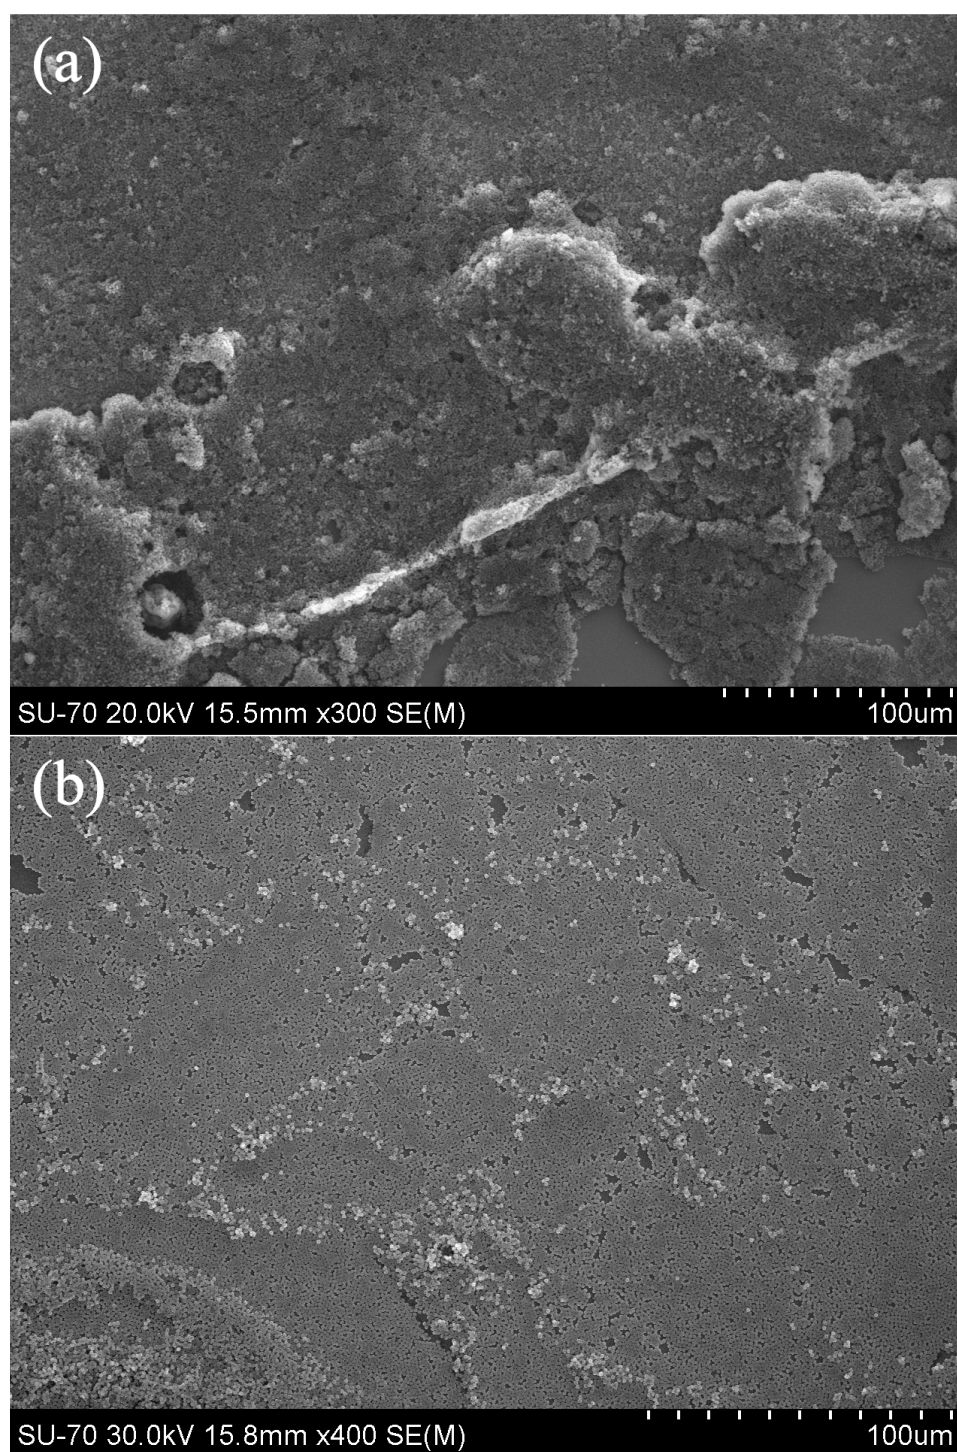

**Figure S2.** By varying the ratio of solvent volume to carbon sphere concentration, drop cast assemblies could be altered to form either single or multi-layers of colloidal carbon spheres.

## Gas Absorption Analysis:

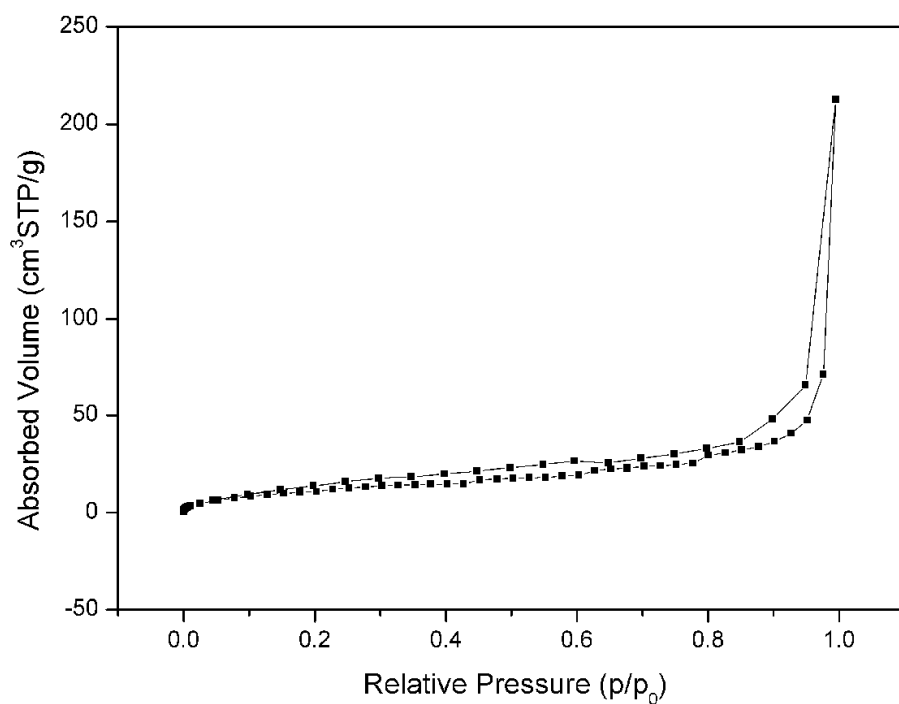

**Figure S3.** N<sub>2</sub> adsorption-desorption isotherms collected from samples of colloidal carbon spheres exhibited low porosity. Analysis of the microporous surface of the spheres gave multi-BET and DFT values of 46.120 m<sup>2</sup>/g and 0.078 cc/g respectively.

## HRSEM and EDS Analysis:

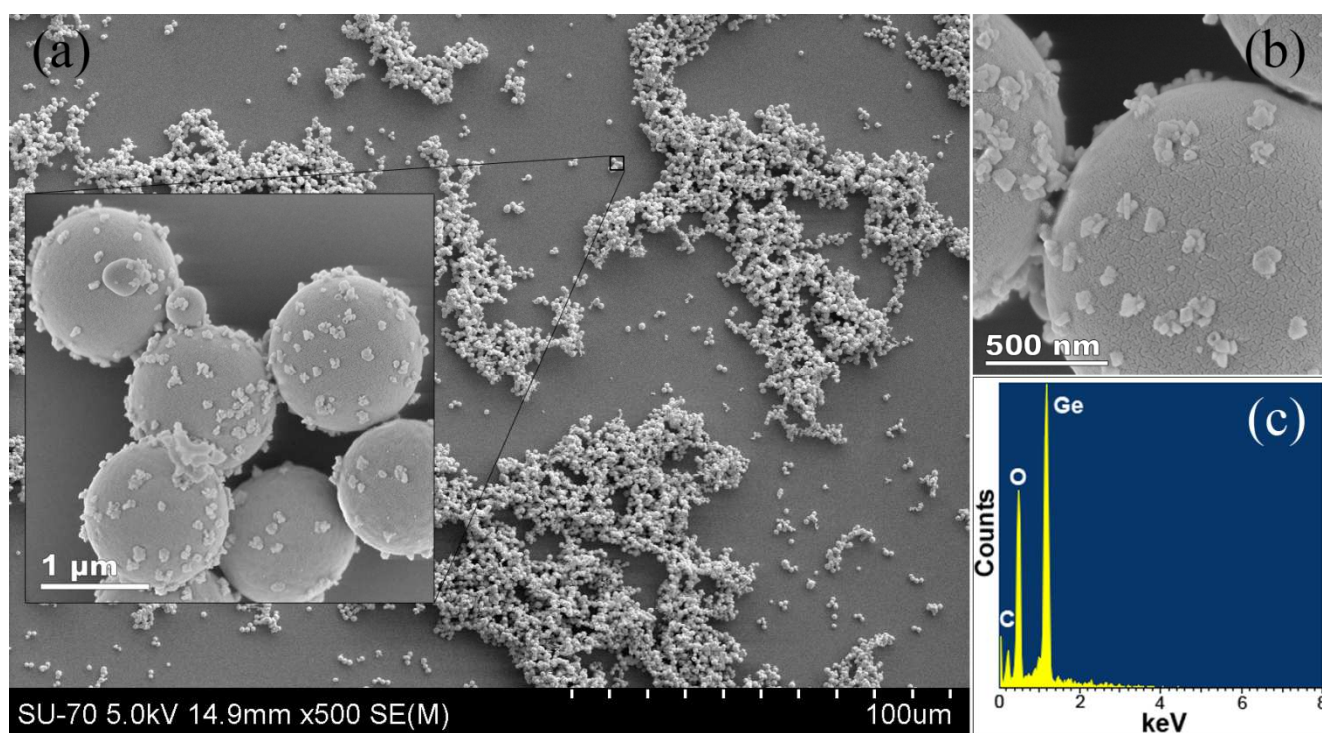

**Figure S4.** SEM image (a) of a bundle of Ge modified carbon spheres deposited onto a silicon wafer, with a high magnification image inset. Nanocrystal dimensions were found to vary in size from 10-40 nm (b). EDS spectrum (c), collected from a dense area of nanocrystals, confirms their predominant Ge composition.

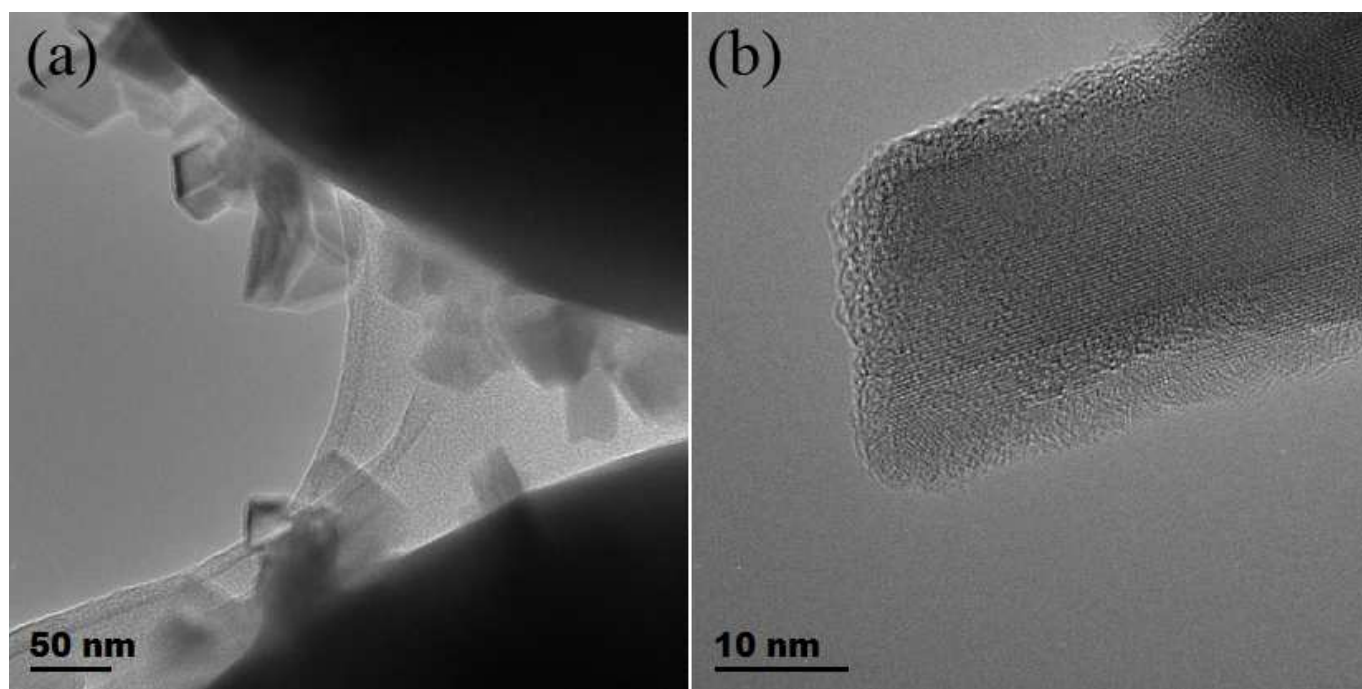

**Figure S5.** TEM image (a) gives an example of the different morphologies of Ge nanocrystals nucleated from the surface of the carbon spheres. The high resolution image (b) shows a rod shaped nanocrystal with visible lattice fringing and native oxide.

## XPS Analysis:

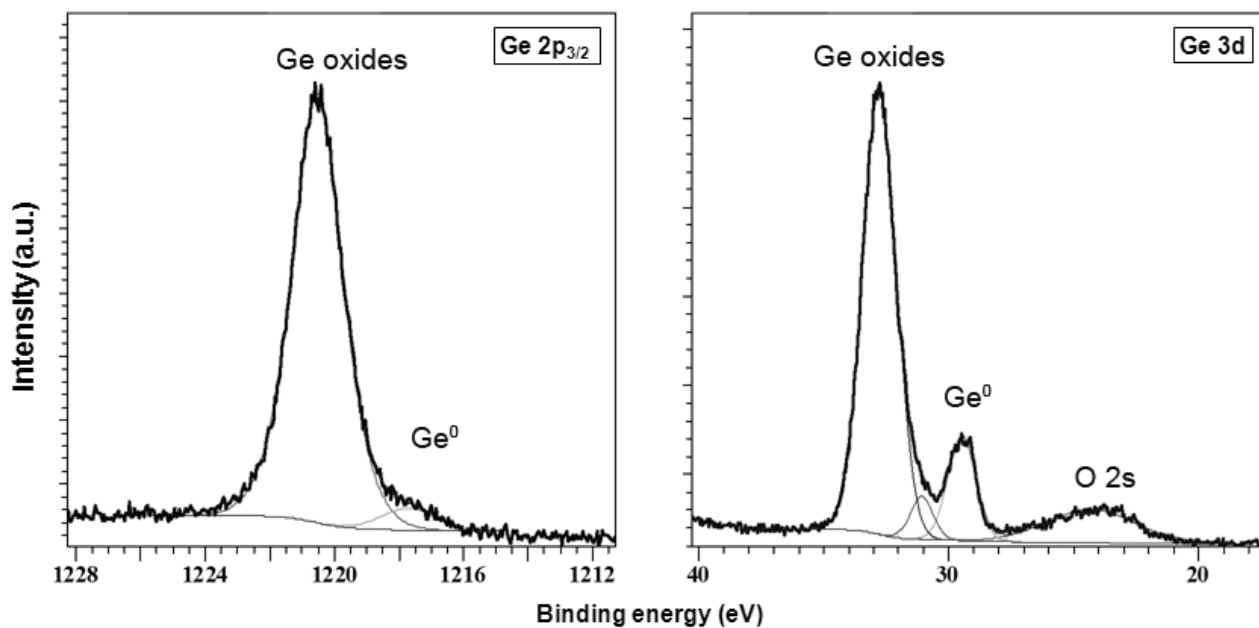

**Figure S6.** XPS spectra obtained from samples of as synthesized carbon spheres with low temperature Ge modification (550°C). The high resolution scans shown here are taken from the spectral regions of Ge 3d and Ge 2p<sub>3/2</sub>.
